# Supplementary material for: Fabrication of a new calix[4]arene-functionalized Mn3O4 nanoparticle-based modified glassy carbon electrode as a fast responding sensor towards Pb2+ and Cd2+ ions
Source: Royal Society of Chemistry journal article supplement (doi:10.1039/c8ay02648c), 2019-01-01
Supplement: c8ay02648c1.pdf [file c8ay02648c1.pdf]

### *Electronic Supplementary Information*

#### **Fabrication of new Calix[4]arene functionalized Mn<sub>3</sub>O<sub>4</sub> nanoparticles based modified glassy carbon electrode as fast responding sensor towards Pb<sup>2+</sup> and Cd<sup>2+</sup> ions**

Prashanth Shivappa Adarakatti<sup>1†</sup>, Ashoka S<sup>2</sup> and Pandurangappa Malingappa<sup>1\*</sup>

<sup>1</sup> Department of Chemistry, Central College Campus, Bangalore University, Bengaluru – 560001

<sup>2</sup> School of Engineering, Dayananda Sagar University, Kudlu Gate, Bengaluru – 560068

\* Corresponding author: [mprangachem@gmail.com](mailto:mprangachem@gmail.com)

† Present address: P.G. Department of Chemistry, KLE's P.C. Jabin Science College, Vidyanagar Hubballi - 580031, India

#### **Interference study**

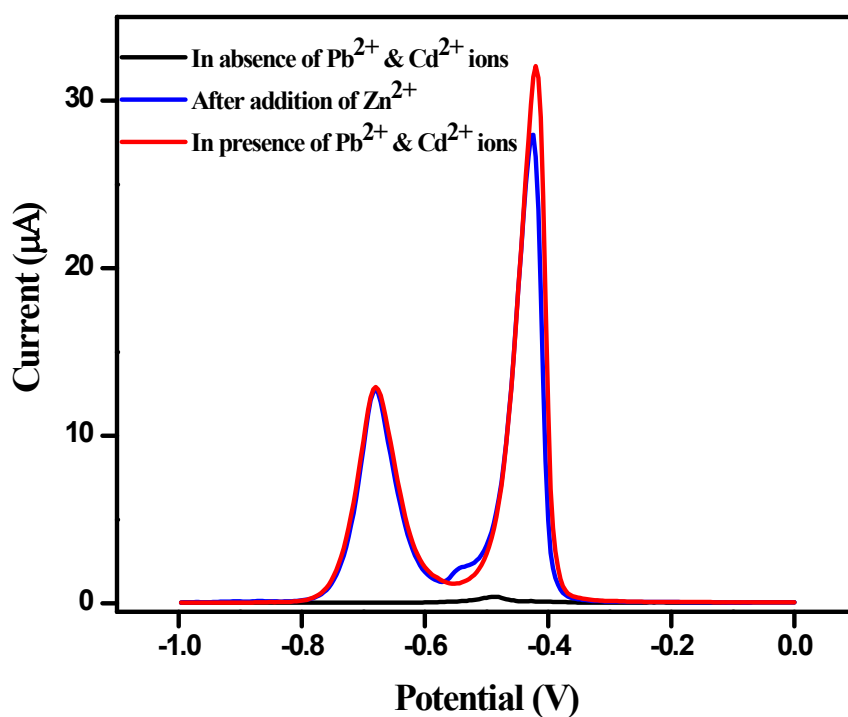

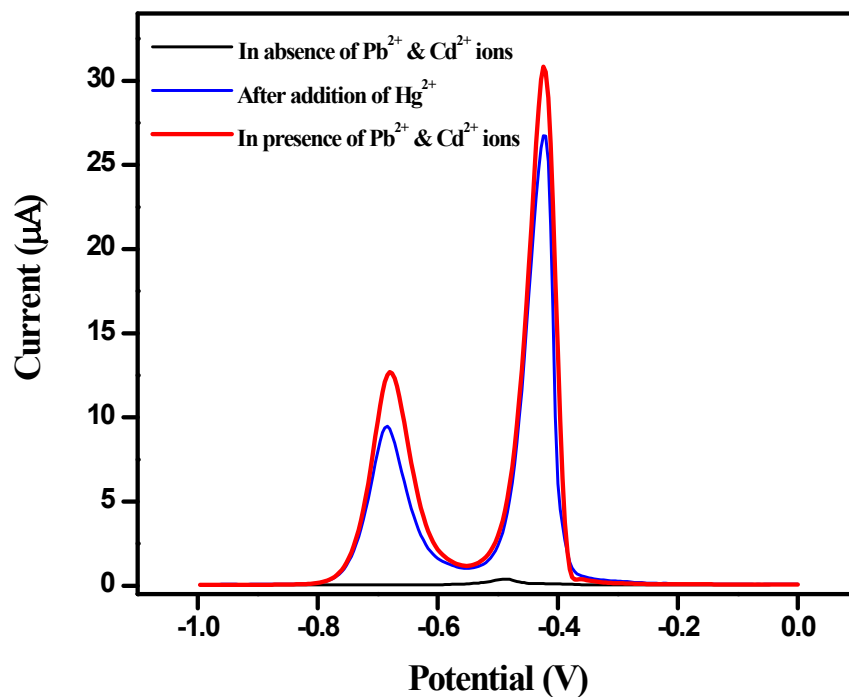

**ESI Figure 1.** Overlaid differential pulse anodic stripping voltammograms of 1500 ppb each of Pb<sup>2+</sup> and Cd<sup>2+</sup> ions in presence of interfering ions like Zn<sup>2+</sup> and Hg<sup>2+</sup> in acetate buffer at pH 6 containing 0.1 M KCl as supporting electrolyte; pre-concentration time 4 min; pre-concentration potential -1.2 V.
